# Supplementary material for: Copper-nanoparticle-dispersed amorphous BaTiO3 thin films as hole-trapping centers: enhanced photocatalytic activity and stability
Source: Royal Society of Chemistry journal article supplement (doi:10.1039/c8ra09204d), 2019-01-01
Supplement: c8ra09204d1.pdf [file c8ra09204d1.pdf]

**Supporting information for**  
**Copper-nanoparticle-dispersed amorphous BaTiO<sub>3</sub> thin films as**  
**hole-trapping centers: Enhanced photocatalytic activity and stability**

Su-Wei Zhang<sup>†a,b</sup>, Shun Li<sup>†c,d</sup>, Bo-Ping Zhang<sup>\*a</sup>, Dongfang Yu<sup>c</sup>, Zuotai Zhang<sup>c</sup> and  
Jing-Feng Li<sup>b</sup>

<sup>a</sup> *The Beijing Municipal Key Laboratory of New Energy Materials and Technologies, School of Materials Science and Engineering, University of Science and Technology Beijing, Beijing 100083, China*

<sup>b</sup> *State Key Laboratory of New Ceramics and Fine Processing, School of Materials Science and Engineering, Tsinghua University, Beijing 100084, China*

<sup>c</sup> *School of Environmental Science and Engineering, Guangdong Provincial Key Laboratory of Soil and Groundwater Pollution Control, Southern University of Science and Technology, Shenzhen 518055, China*

<sup>d</sup> *Academy for Advanced Interdisciplinary Studies, Southern University of Science and Technology, Shenzhen 518055, China*

---

\* Corresponding Author.

Phone: +86-010-62334195; E-mail address: [bpzhang@ustb.edu.cn](mailto:bpzhang@ustb.edu.cn) (B.-P. Zhang)

<sup>†</sup> These authors contributed equally to this work.

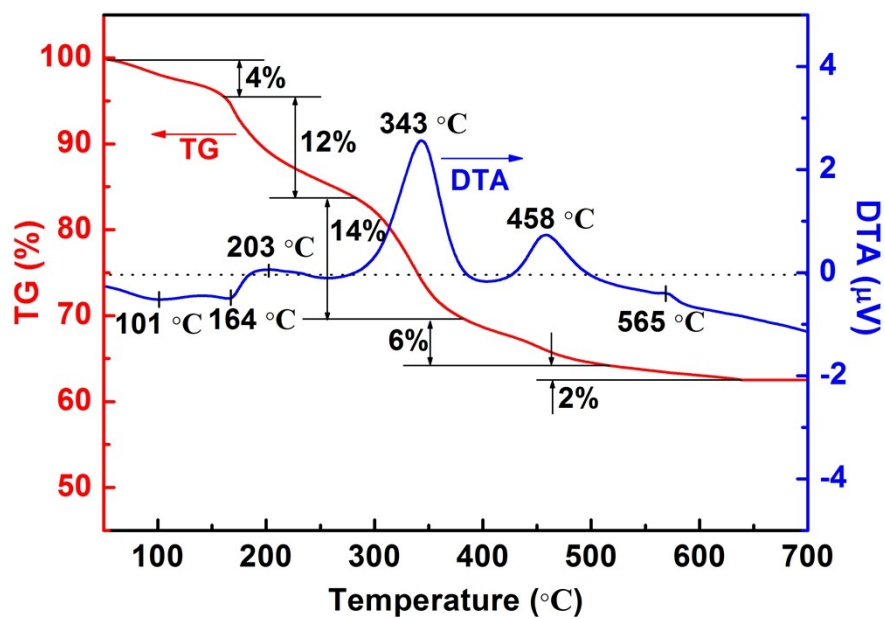

Fig. S1. TG-DTA curves of the Cu<sub>25</sub>/BTO precursor powders.

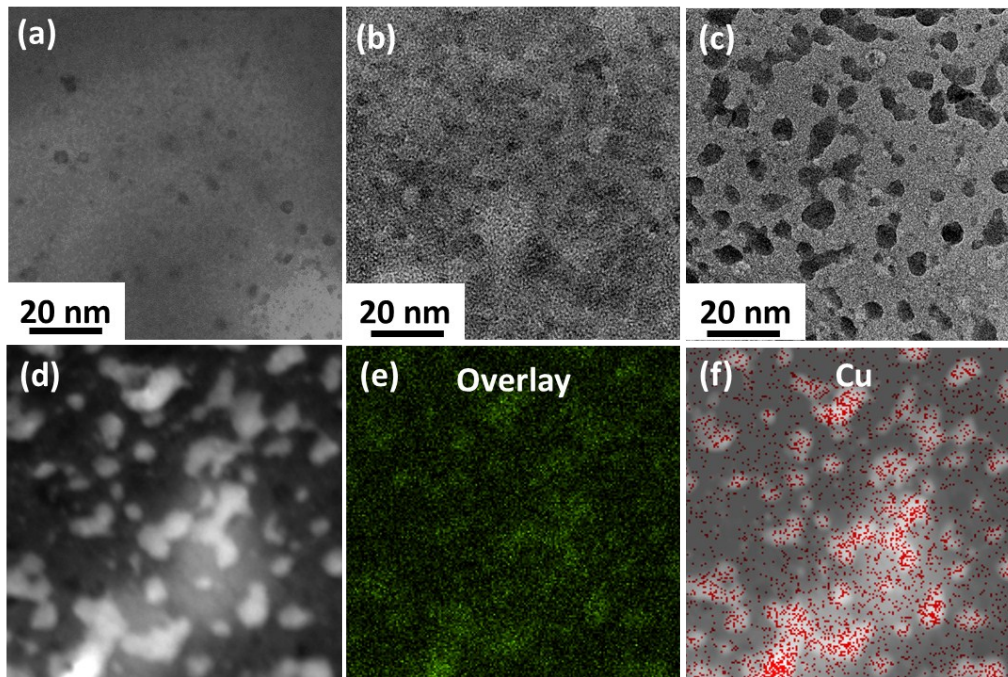

**Fig. S2.** (a-c) TEM micrographs for the  $\text{Cu}_x/\text{BTO}$  samples with  $x = 10, 15$  and  $35$ , respectively. (d) HAADF-STEM image and corresponding EDX mappings of the  $\text{Cu}_{35}/\text{BTO}$  sample: (e) overlay and (f) Cu.

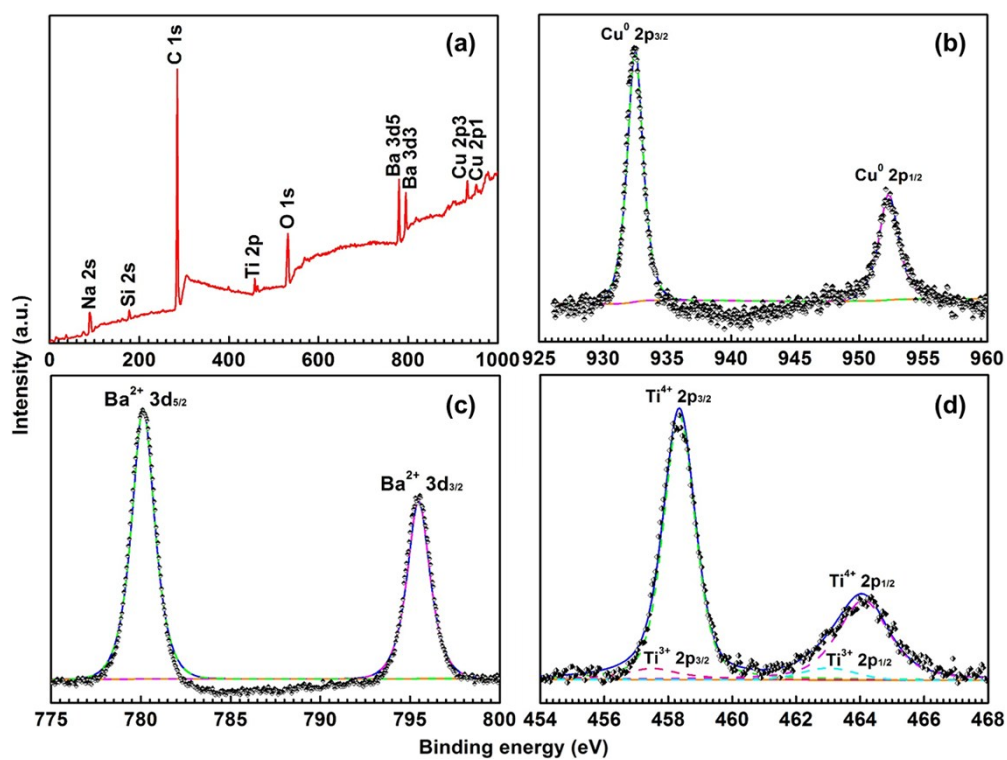

**Fig. S3.** (a) XPS survey spectra and High-resolution XPS spectra of (b) Cu 2p, (c) Ba 3d and (d) Ti 2p of the  $\text{Cu}_{25}/\text{BTO}$  sample

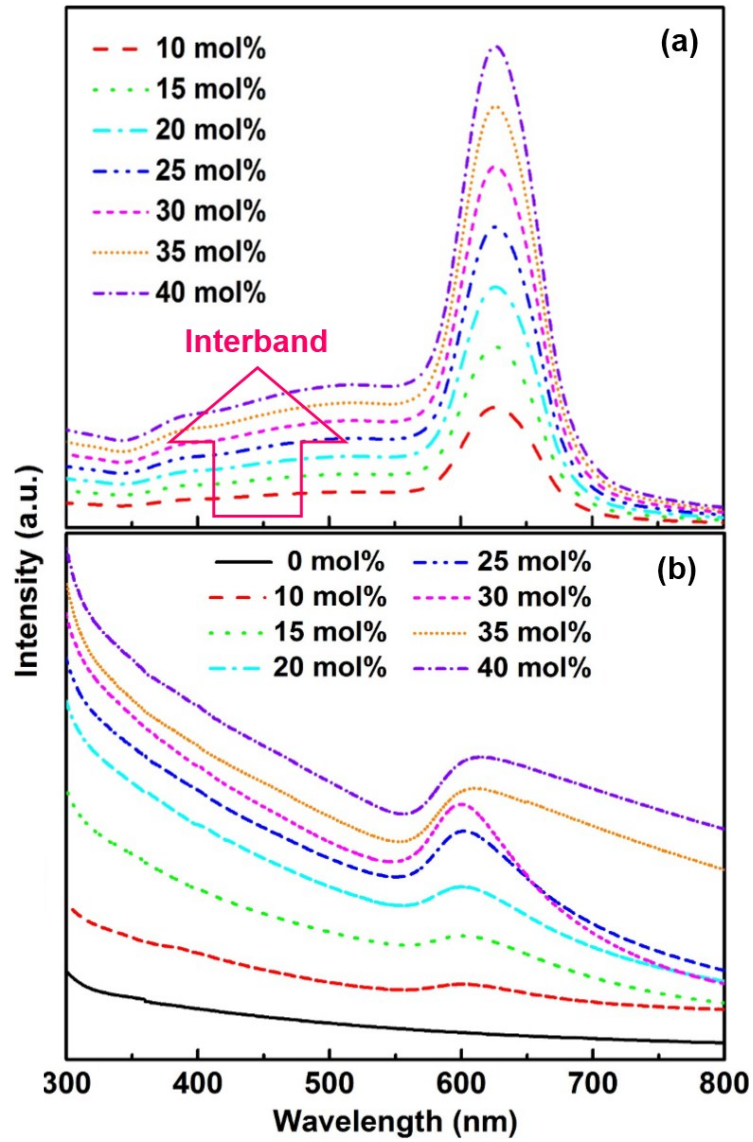

**Fig. S4.** (a) Theoretical optical absorption spectra of the Cu<sub>x</sub>/BTO thin films calculated by Mie theory. (b) Experimental optical absorption spectra obtained for the Cu<sub>x</sub>/BTO thin films.

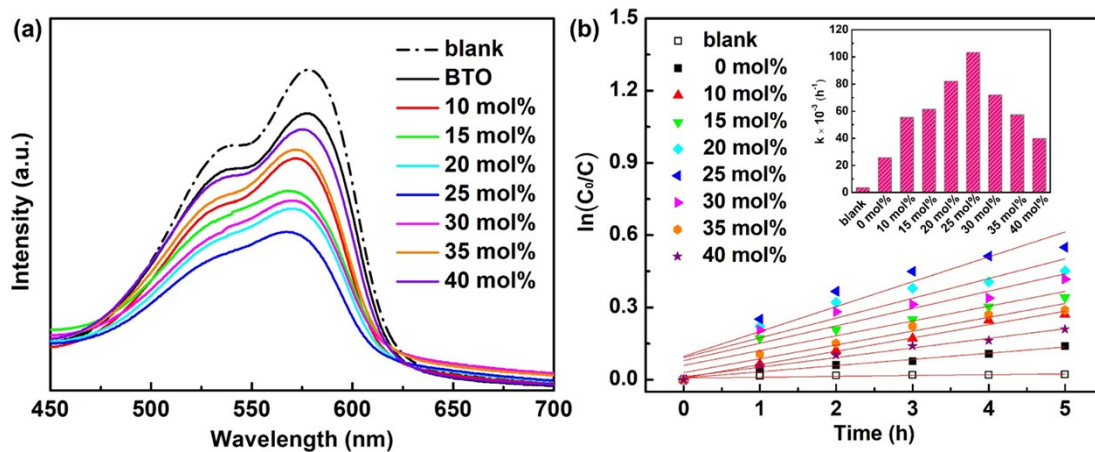

**Fig. S5.** (a) The absorption spectra of RhB after photocatalytic degradation by various samples for 300 min. (b) Fitted plot of  $\ln(C_0/C)$  versus the degradation time according to the first order kinetics. Inset of (b) shows the histogram of the degradation rates.
